# Supplementary material for: N-Doped Carbon Nanowire-Modified Macroporous Carbon Foam Microbial Fuel Cell Anode: Enrichment of Exoelectrogens and Enhancement of Extracellular Electron Transfer
Source: MDPI journal article supplement (doi:10.3390/ma17010069), 2023-12-22
Supplement: s1 [file s1]

## Supporting Information

# N-Doped Carbon Nanowire-Modified Macroporous Carbon Foam Microbial Fuel Cell Anode: Enrichment of Exoelectrogens and Enhancement of Extracellular Electron Transfer

Ke Liu <sup>1</sup>, Zhuo Ma <sup>2</sup>, Xinyi Li <sup>3</sup>, Yunfeng Qiu <sup>3,\*</sup>, Danqing Liu <sup>1,\*</sup> and Shaoqin Liu <sup>3</sup>

<sup>1</sup> School of Material Science and Chemical Engineering, Harbin University of Science and Technology, Harbin 150040, China

<sup>2</sup> Harbin Institute of Technology, School of Life Science and Technology, Harbin 150001, China

<sup>3</sup> Key Laboratory of Microsystems and Microstructures Manufacturing, Harbin Institute of Technology, School of Medicine and Health, Harbin 150080, China

\* Correspondence: qiuyf@hit.edu.cn (Y.Q.); danqingliu76@163.com (D.L.)

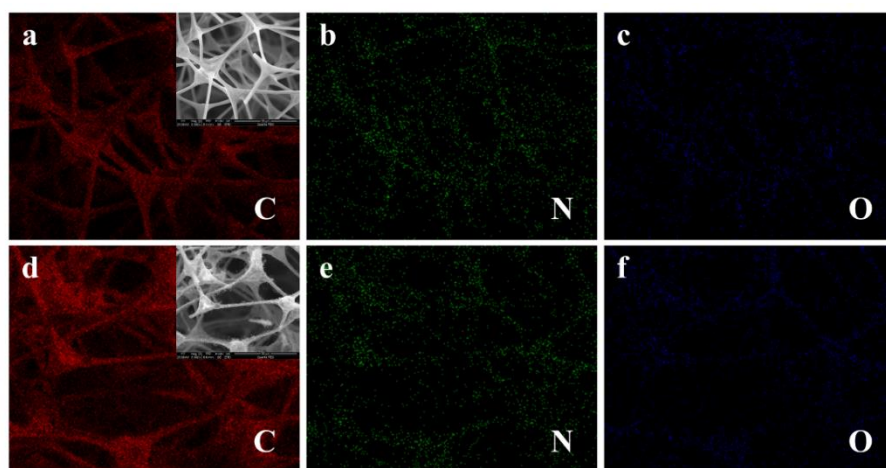

**Figure S1.** The corresponding EDS elemental mapping of C, N, and O on (a, b, and c) CMF and (d, e, and f) NC@CMF.

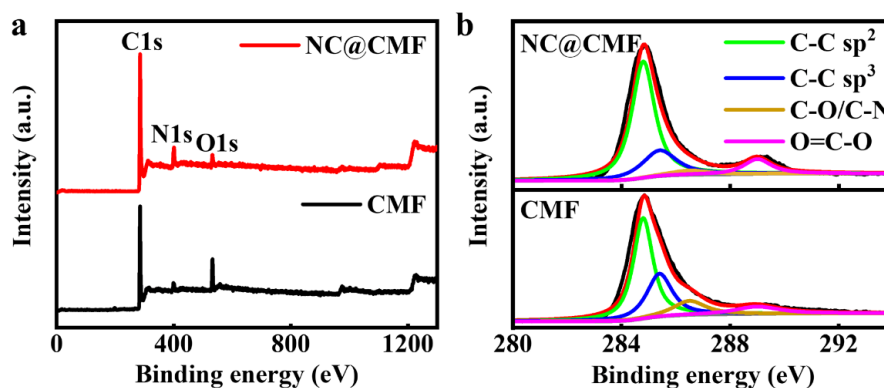

**Figure S2.** (a) XPS full spectra and (b) C1s XPS spectra of CMF and NC@CMF.

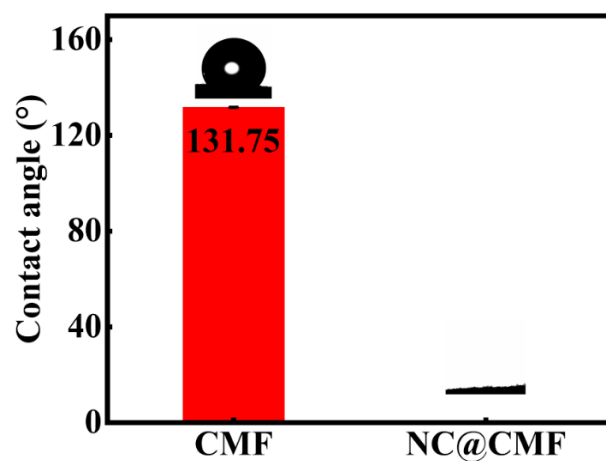

Figure S3. The contact angle test of CMF and NC@CMF.

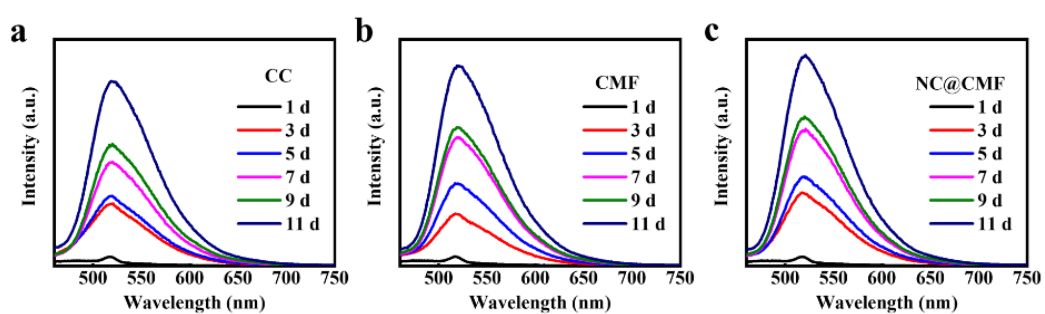

Figure S4. Emission spectra of (a) CC, (b) CMF, and (c) NC@CMF after inoculation for 11 days.

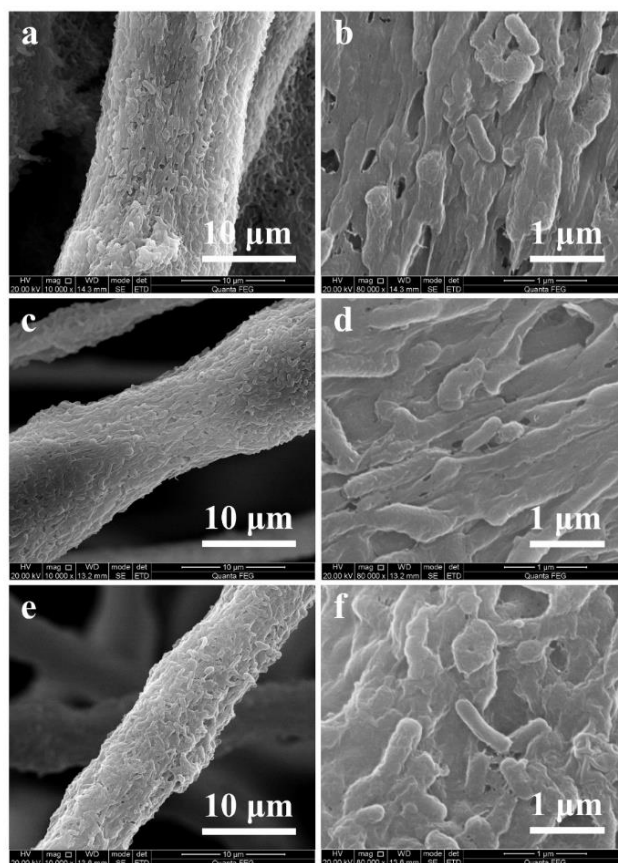

Figure S5. The SEM images of biofilms on the outside of (a, b) CC, (c, d) CMF, and (e, f) NC@CMF after 60 days.

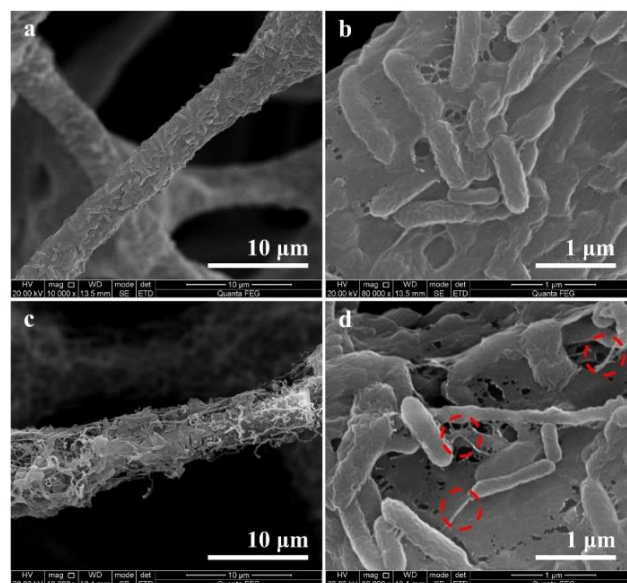

**Figure S6.** The SEM images of biofilms on the inside of (a, b) CMF and (c, d) NC@CMF after 60 days. Red circles in (d) indicated the presence of nanoconduits.

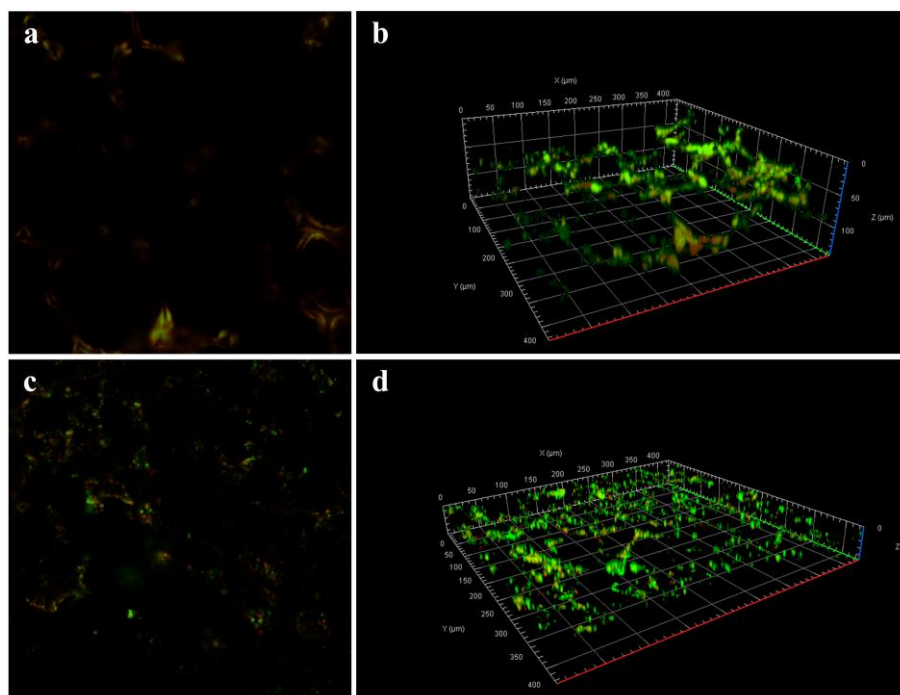

**Figure S7.** CLSM photographs of biofilms on the inside of (a, b) CMF and (c, d) NC@CMF after 60 days.

**Table S1.** Composition of minerals and vitamins in anolyte.

| Vitamins ( $\mu\text{g L}^{-1}$ ) |     | Minerals ( $\text{mg L}^{-1}$ )                        |     |
|-----------------------------------|-----|--------------------------------------------------------|-----|
| biotin                            | 2   | $\text{MgSO}_4 \cdot 7\text{H}_2\text{O}$              | 30  |
| folic acid                        | 2   | NTA                                                    | 15  |
| p-aminobenzoic acid               | 5   | NaCl                                                   | 10  |
| thioctic acid                     | 5   | $\text{FeSO}_4 \cdot 7\text{H}_2\text{O}$              | 1   |
| riboflavin                        | 5   | $\text{CuSO}_4 \cdot 5\text{H}_2\text{O}$              | 0.1 |
| aneurine HCl                      | 5   | $\text{CoCl}_2 \cdot 6\text{H}_2\text{O}$              | 1   |
| nicotinic acid                    | 5   | $\text{CaCl}_2$                                        | 1   |
| calcium pantothenate              | 5   | $\text{ZnSO}_4 \cdot 7\text{H}_2\text{O}$              | 1   |
| B-12                              | 0.1 | $\text{Na}_2\text{MoO}_4 \cdot 2\text{H}_2\text{O}$    | 0.1 |
| pyridoxine HCl                    | 10  | $\text{H}_3\text{BO}_3$                                | 0.1 |
|                                   |     | $\text{AlK}(\text{SO}_4)_2 \cdot 12\text{H}_2\text{O}$ | 1   |
|                                   |     | $\text{MnSO}_4 \cdot \text{H}_2\text{O}$               | 5   |

**Table S2.** Reported 3D porous anodes compared with NC@CMF.

| Anode material  | Maximum volume power density* ( $\text{W/m}^3$ ) | Inoculum      | Substrate      | References       |
|-----------------|--------------------------------------------------|---------------|----------------|------------------|
| GA              | 2.38                                             | Mixed culture | Sodium acetate | [1]              |
| A-CMC-Gr-PD     | 3.51                                             | Mixed culture | Sodium acetate | [2]              |
| CS-NCNT-PANI    | 4.2                                              | Mixed culture | Sodium acetate | [3]              |
| HA/GA           | 4.46                                             | Mixed culture | Sodium acetate | [4]              |
| G-800           | 4.59                                             | Mixed culture | Sodium acetate | [5]              |
| NP/SCC          | 4.62                                             | Mixed culture | Sodium acetate | [6]              |
| PPy-CMC/N-CNT/S | 4.88                                             | Mixed culture | Sodium acetate | [7]              |
| N-MWCNT/GA      | 5.04                                             | Mixed culture | Sodium acetate | [8]              |
| NPVP-RFC        | 9.23                                             | Mixed culture | Sodium acetate | [9]              |
| HPCF            | 11.21                                            | Mixed culture | Sodium acetate | [10]             |
| NC@CMF          | 5.32                                             | Mixed culture | Sodium acetate | <b>this work</b> |

\* Power density was normalized by anode chamber volume.

## References

- Yu, F.; Wang, C.; Ma, J. Capacitance-Enhanced 3D Graphene Anode for Microbial Fuel Cell with Long-Time Electricity Generation Stability. *Electrochim. Acta* **2018**, *259*, 1059–1067.
- Call, T.P.; Carey, T.; Bombelli, P.; Lea-Smith, D.J.; Hooper, P.; Howe, C.J.; Torrisi, F. Platinum-Free, Graphene Based Anodes and Air Cathodes for Single Chamber Microbial Fuel Cells. *J. Mater. Chem. A* **2017**, *5*, 23872–23886.
- Xu, H.; Wang, L.; Wen, Q.; Chen, Y.; Qi, L.; Huang, J.; Tang, Z. A 3D Porous NCNT Sponge Anode Modified with Chitosan and Polyaniline for High-Performance Microbial Fuel Cell. *Bioelectrochemistry* **2019**, *129*, 144–153.
- Zhao, T.; Qiu, Z.; Zhang, Y.; Hu, F.; Zheng, J.; Lin, C. Using a Three-Dimensional Hydroxyapatite/Graphene Aerogel as a High-Performance Anode in Microbial Fuel Cells. *J. Environ. Chem. Eng.* **2021**, *9*, 105441.
- Li, J.; Qiu, Y.; Li, D.; Wu, J.; Tian, Y.; Liu, G.; Feng, Y. Revealed Mechanism of Micron-Pore Size of 3d Bio-Anode on the Behavior of Biofilm and System Performance in Microbial Electrochemical System. *Chem. Eng. J.* **2023**, *464*, 142736.
- Yuan, H.; Dong, G.; Li, D.; Deng, L.; Cheng, P.; Chen, Y. Steamed Cake-Derived 3D Carbon Foam with Surface Anchored Carbon Nanoparticles as Freestanding Anodes for High-Performance Microbial Fuel Cells. *Sci. Total Environ.* **2018**, *636*, 1081–1088.
- Wang, Y.; Pan, X.; Chen, Y.; Wen, Q.; Lin, C.; Zheng, J.; Li, W.; Xu, H.; Qi, L. A 3D Porous Nitrogen-Doped Carbon Nanotube Sponge Anode Modified with Polypyrrole and Carboxymethyl Cellulose for High-Performance Microbial Fuel Cells. *J. Appl. Electrochem.* **2020**, *50*, 1281–1290.
- Jin, S.; Feng, Y.; Jia, J.; Zhao, F.; Wu, Z.; Long, P.; Li, F.; Yu, H.; Yang, C.; Liu, Q.; et al. Three-Dimensional N-Doped Carbon Nanotube/Graphene Composite Aerogel Anode to Develop High-Power Microbial Fuel Cell. *Energy Environ. Mater.* **2022**, *6*, e12373.
- Sun, J.; Wang, R.; Li, H.; Zhang, L.; Liu, S. Boosting Bioelectricity Generation Using Three-Dimensional Nitrogen-Doped Macroporous Carbons as Freestanding Anode. *Mater. Today Energy* **2023**, *33*, 101273.
- Li, H.; Zhang, L.; Wang, R.; Sun, J.; Qiu, Y.; Liu, S. 3D Hierarchical Porous Carbon Foams as High-Performance Free-Standing Anodes for Microbial Fuel Cells. *EcoMat* **2022**, *5*, e12273.
